# Supplementary material for: Response of the IEA Wind 15 MW – WindCrete and Activefloatfloating wind turbines to wind and second-order waves
Source: Copernicus journal article supplement (doi:10.5194/wes-2021-11), 2021-02-18
Supplement: Supplementary file [file wes-2021-11-AC1-supplement.pdf]

## Authors' response to reviewer 1

We thank the reviewer for the valuable comments and suggestions, which we consider very important and help us sharpen and improve the manuscript. Here are our responses to each comment.

The authors response is shown in green.

### General comments:

Research objectives: “The goal of this work is to investigate the floaters responses at different load cases.” Is a bit vague as a research objective. The design limits that were checked for should be more clearly highlighted.

As the authors stated this works is somewhat lacking of experimental validation, that will be performed in a following stage of the work. The very high wind excitation, around the floater’s natural frequencies is acknowledged by the authors but the explanation of this phenomena can be improved. To address this, and also to benchmark the performance of the novel floater concepts, I would suggest to compare the response of the Activefloat concept to the reference U-Maine floater design for the IEA 15MW made available by C. Allent et al. “Definition of the UMaine VoltturnUS-S Reference Platform Developed for the IEA Wind 15-Megawatt Offshore Reference Wind Turbine”. This would also allow for one to see how a more “standard” design fares in a site with mild sea conditions.

Results: A critical interpretation of the results shown would greatly help to illustrate advantages and disadvantages of the proposed concepts. Also the readability of this section would improve if the layout is changed, there are often more than 2 pages between figures and the point in the text where they are referenced.

We have two objectives for our work. First, we want to introduce the floaters’ designs and their coupling to the 15MW IE-Wind reference model. Second, we want to assess the floaters response at different load cases, with a focus on the effect of second order forces on low frequency response of the floater. We added a part to the introduction to make our objectives clearer. The designs were checked against the design limits presented in [1], which is now added to the introduction.

Comparing the two semi-submersible concept is really interesting, for better understanding of both designs and the effect of different design parameters on the system’s response. However, comparing to other designs such as U-Maine is out of scope for our goals within this work for the following reasons. First, we are introducing the new floater designs as an open source reference models, to be further used within the research community for research purposes. Second we are presenting two different floater concepts, a spar and a semi-submersible. It will be unfair for the spar WindCrete model to shed more light on the semi-submersible design. Finally, COBRA the owner of the Activefloat

design are against direct comparison with different models in the work done within COREWIND.

We agree with the reviewer that the current position of the figures creates confusion. However, the layout of the figures will be adapted by the publisher in the last phase after the reviewings are done. This will increase the clarity and enhance the flow of the paper.

### **Specific Comments:**

Section 2.2: Please include the number and range of frequencies for which the potential flow problem is solved or reference to document where they can be found. This can be quite useful as a guideline for readers attempting to model similar systems.

This information is added to the text.

Line 120: Hub-height is lower than IEA 15MW nominal value (150m). This has obvious benefits on stability as it lower COG and point of thrust application but may increase blade fatigue due to increased wind shear. Was this evaluated during design?

This is a very interesting remark. Our focus is on the novel floater design and the combination with the IEA Wind 15 MW. Hence we think that investigations like the one suggested by the reviewer will be part of future work.

Although in the WindCrete concept tower and platform are a unique piece on concrete, these are modelled in OpenFAST as a flexible tower and rigid platform correct? Is this assumption reasonable? Please clarify.

Yes, it is correct. The tower is modeled as a flexible body and the floater is considered rigid following standard modelling procedures in FAST, the floater below MWL was modelled as rigid. Since the floater diameter and wall thickness are larger than for the tower below MWL, this approach can be regarded as a good first approximation. An assessment of the effect of floater flexibility for a 10 MW spar floater was presented in [2]. It was found, for that floater, that when a flexible mode was introduced, the overall response behaviour of the rigid body modes were preserved although with some increase in the response amplitude operators to linear wave forcing of surge and pitch. The largest increase was of 17% and occurred at the natural frequencies of the surge and pitch modes

Moreover, The division of the tower and the platform in two different parts in the numerical model, does not affect the monolithic concept of WindCrete. When we check WindCrete's design limit against ultimate and fatigue loads over the tower height, the Minimum Breaking Load (MBL) is defined only by the MBL of the concrete material, and no connection point is assumed in the structure.

Line 165: The way the active ballast system is implemented in OpenFAST is unclear. Is the floater's CG changed according to the values in table 6 based

on the mean wind speed of the simulation? Mahfouz 2020 “Public design and FAST models of the two 15MW floater-turbine concepts”

This information is added to the text.

Line 200: The loadcases used represent a standard set for verification. However when verifying “open” designs many authors include more extensive datasets that are often based on international standards (see Allen et al. Definition of the UMaine VoltturnUS-S Reference Platform Developed for the IEA Wind 15-Megawatt Offshore Reference Wind Turbine). Please justify the choice of the loadcases in the present study.

We believe we misused the word verification through the paper. The main goal of the paper is not the verification of the models. The main goal is to present the floaters to the research community and to analyze and assess the floaters’ performance at different load cases with an emphasis on the second order wave forces effects. We believe the set of load cases we used achieved this goal, and showed the behaviour of both floaters.

Figures 3 and 4: For the surge decay of the windcrete and pitch decay of the activefloat concepts there seems to be a low-frequency component superimposed to the natural response frequency. What would be the cause of such phenomenon?

Yes, this is correct. We tried to explain this by the sentence in line 228 “The surge decay includes not only one frequency, but a combination of different frequencies because it is measured at the mean sea level and not at the CG of the FOWT system.”. We added to this sentence now to clarify.

Line 240: What are the initial conditions in the model? Why weren’t initial conditions imposed to be equal to the mean value reached during the simulation to shorten initial transients? I am afraid that results in regular waves may be quite inaccurate with such large initial transients compared to “steady state” response. Figures 6 and 7: I am afraid that the initial transients will have a non-negligible impact on the PSDs shown.

For all the simulations with wind fields, the initial conditions used are corresponding to the platform mean equilibrium position when a steady wind field is acting on the turbine in the absence of waves.

The regular waves simulations were done without setting the correct initial conditions, hence the WindCrete platform does not reach steady state. This load case is now repeated with the correct steady states to decrease the transient time, and the platform reaches steady state in less than 1500 s. For the PSDs drawn in Figures 6 and 7, we excluded the first 1500 s, the figures shown only analyse the frequency response of the last 1500 s. We added this information to the text.

Line 248, Figure 8: Pitch-surge couplings will be observed if the motion of the FOWT is not plotted with respect to it’s instantaneous center of rotation.

Decoupling these two DOFs is therefore only possible if motion is shown with respect to its center of rotation. I believe that showing the motion with respect to the COG only introduces more confusion.

Yes, that's correct. However, we think that using the CG is enough for the following reasons. First, the difference between the CG and the instantaneous center of rotation is very small. Second, we only wanted to show that second order forces have a limited effect on the surge motion and to prove that the big difference in the surge response shown in Figure 6 is only because the surge motion is measured at the sea water level. If we shift the measuring point to the CG as in Figure 8, it is clear that only pitch DOF is highly affected by the second order wave forces. We can see now that our explanation was not clear and we rephrased that part.

Lines 255-260: I think this part could be rephrased to improve clarity. The first time I read this section it seemed to me that the authors were implying some sort of connection between forcing introduced by QTFs and that introduced by Morrison Drag, which is not the case.

This is modified now in the text.

Line 263: "the Activefloat active ballast system is now activated to keep the mean static pitch of the platform around zero" could you clarify what this means? See previous comments.

This is clarified in the answer to a previous comment

Line 268: "In Figure 11, the frequency response shows a surge, pitch coupling." Can you explain this better?

This is now added to the text. Vertical lines showing the natural frequencies of different DOFs are also now added to the images to provide a clearer illustration.

Line 272: This is interesting. Wind is often thought of as a damping force. The fact that a NTM spectrum excites the platform's natural frequencies seems worrying to me. Can this be mitigated with controller tuning?

A similar response at operation conditions with NTM wind field was found for the 10MW DTU reference model coupled to OO-Star Wind Floater, which can be seen in [3]. We agree that this is an interesting effect to keep in mind. However, as long as the forces and the excitation limits are within the design specification for different load cases, this is a normal response especially due to the higher thrust forces in the 15MW reference model. Further tuning of the baseline controller used will have a small effect on these responses, an advanced controller approach with extra loops to account for the platform accelerations could be applied to damp the platform's responses. This is part of future research focusing on optimizing the models.

Conclusions: Impact and significance of this work should be highlighted more

clearly. For instance the dominant wind-driven excitation of natural frequency observed with this large-thrust rotor is not well highlighted. Also a discussion on how this issue can be mitigated should be provided. Some of the statements in the conclusions, such as “For the Gran Canaria site with mild wave loads, the motion responses were dominated by low frequency forces, at the natural frequencies of the floaters.” should also be stated in the results. This would provide this section with some much needed interpretation and not only description of what is shown in the plots.

Thank you for these suggestions. The conclusions are updated now to include them.

## References

- [1] Fernando Vigara, Lara Cerdán, Rubén Durán, Sara Muñoz, Mattias Lynch, Siobhan Doole, Climent Molins, Pau Trubat, and Raúl Gunache. Design basis, September 2020.
- [2] Michael Borg, Anders Melchior Hansen, and Henrik Bredmose. Floating sub-structure flexibility of large-volume 10MW offshore wind turbine platforms in dynamic calculations. *Journal of Physics: Conference Series*, 753(8), 2016.
- [3] Antonio Pegalajar-Jurado, Henrik Bredmose, Michael Borg, Jonas G. Straume, Trond Landbø, Hakon S. Andersen, Wei Yu, Kolja Müller, and Frank Lemmer. State-of-the-art model for the LIFES50+ OO-Star Wind Floater Semi 10MW floating wind turbine. *Journal of Physics: Conference Series*, 1104(1), 2018.
